# Supplementary material
Source: HighWire-hosted journal article supplement (doi:10.1101/rna.066522.118)
Supplement: Supplemental_Legends.docx [file Supplemental_Legends.docx]

# Supplemental Legends

# S1 Fig. Quality control of RNA-seq libraries. (A) Total number and percentage (B) of uniquely alignable reads from each RNA-seq library. (C) Percent of reads overlapping exons, introns, or unannotated per library, when defined by existing Ensembl annotations or the transcriptome built in this study (stringtie + taco).

**S2 Fig. Variant identification workflow and distribution of detected variants.** (A) Schematic for variant calling based on GATK best practices for variant calling from RNA-seq. (B) Distribution of variants detected by GATK pipeline. (C) Fold enrichment of variants detected over variants detected for each complement mismatch type.

**S3 Fig. Editing frequencies for conserved *HTR2C* and *GRIA2* editing sites.** Editing frequencies for *HTR2C* and *GRIA2* CDS recoding sites conserved in mammals.

**S4 Fig. Selection of the number of clusters for k-means clustering.** (A) Within-groups sum of squares for various k values for k-means clustering of the GATK significant editing sites or (B) the hyper-edited sites. (C) Heatmap of hyper-edited sites segregated with k = 2. Note that many sites in group 2 have cold-enriched editing, and therefore for the hyper-edited sites k = 3 was chosen to segregate cold-enriched editing sites from sites with non-cold-enriched editing.

**S5 Fig. Significant non-A-to-G variants are not enriched for late torpor or arousing from torpor states**. Heatmaps of variant allele frequencies for significant non-A-to-G mismatches. Note that the rows displayed in each heatmap represent different variant sites. Rows and columns are ordered by hierarchical clustering.

**S6 Fig. An ANOVA test using editing frequencies produces a similar set of editing sites, and also demonstrates widespread cold-enriched A-to-I editing.** (A) Heatmap of editing frequencies for significant editing sites (FDR < 0.01) identified by an ANOVA test. (B) Euler diagram showing the overlap between significant sites identified by an ANOVA test or the edgeR approach.

**S7 Fig. A two group comparison between cold and warm states confirms widespread cold-enriched RNA editing.** (A) MA plot demonstrating significant editing sites (FDR < 0.01) identified using a two group comparison with edgeR of cold (LT and Ar) and warm (IBA, SA, and SpD) states. Significant sites are shown in blue. (A) Sites identified by the GATK pipeline (B) Sites identified by the hyper-editing pipeline.

**S8 Fig. Pipeline for identifying hyper-edited regions from unaligned reads.** Hyper-editing pipeline implemented as described by Porath H. et al. 2014. Mean +/- sd of reads, alignments, or sites of A-to-G conversions are shown.

**S9 Fig. Hyper-edited sites are primarily A-to-G variant type and enriched in arousing from torpor and late torpor.** (A) Number of unique hyper-edited sites detected for each possible allele type following approach described in Porath et al. 2014. Only sites supported by at least 2 reads are shown. (B) Distribution of shared unique hyper-editing sites identified in each sampling group. (C) Unique hyper-edited clusters identified in each brain region for each variant type. Clusters located within 20 nucleotides were merged. (D) Unique hyper-edited sites identified in each brain region for each variant type.

**S10 Fig. Examining differences in cold-enriched editing across brain tissues.** (A) Euler diagrams showing the number of significant editing sites (FDR < 0.01) found in each brain region for the GATK sites or hyper-editing sites. (B) Normalized read coverage (Reads Per Million reads uniquely mapped) at editing sites found significant in one, two, or all three brain regions. (C) Examples of editing sites that are significant in only 1 brain region, but have similar or higher read coverage in the non-significant brain regions. These sites also have high coverage values (> 0.5 Reads Per Million) and high FDR (> 0.5) in at least one non-significant region, and were the top 5 sites with the lowest FDR values for the significant region. (D) Editing index for sites that are significant in only one brain region, and have equivalent or higher read coverage in the non-significant regions. Editing index was computed only using the libraries from the brain regions that were not called as significant for each each site, so as to examine the overall pattern of editing in regions for sites that were not called significant.

**S11 Fig. Description of dsRNA alignment analysis and example dsRNA regions.** (A) Schematic depicting blastn based approach to identify dsRNA regions. (B) Selected examples of regions identified as dsRNA. The best alignment from each chromosome was selected and shown are the top 4 alignments ranked by e-value. Arrows indicate the position of the editing site. Regions were folded and visualized using tools from the ViennaRNA package.

**S12 Fig. Heatmap of RNA editing frequencies for editing sites selected for gDNA and cDNA validation.** Predicted effects of the editing events are annotated beneath each gene name. The *GRIA2* R/G editing site was selected as a known editing site as a positive control. The *DKK3* site is a group 2 site identified by the GATK pipeline that was predicted to likely be a SNP and therefore selected as a control to confirm the sanger sequencing approach. Sites without read coverage are colored grey.

**S13 Fig.** **Abundance of edited transcripts selected for validation.** (A-J) Normalized FPKM values for genes containing editing sites selected for validation by sanger sequencing. FDR values are derived from an ANOVA-like test for differential expression across sampled hibernation states.

**S14 Fig. Dideoxy sequencing validation of editing sites.** Chromatograms show the edited nt (arrow) +/- 3 neighboring nt for each site from cerebrum cDNA and liver genomic DNA from one Ar (cold hibernator) and one SpD (warm euthermic) individual ground squirrel. Six of the cold-edited sites recovered in our analysis are shown in addition to the fully ADAR edited (+) control GRIA2 site. The bottom right *DKK3* (-) control shows liver genomic DNA sequence recovered from four individuals, two homozygous and two heterozygous, at the GATK group II site that was predicted to be a SNP.

**S15 Fig. RNA editing does not disrupt *ZCCHC8* splicing at exons 11 and 12.** (A) UCSC gene model depicting the *ZCCHC8* locus with the locations of cold-enriched RNA editing sites depicted. (B) UCSC browser snapshot of RNA-seq coverage across a retained intron between exon 11 and 12 that contains an editing site, that when edited, disrupts a splice acceptor. Coverage tracks displayed are a single library from each brain region at each stage. (C) Editing frequency for this site that potentially disrupts a splice acceptor. (D) Relative exon or intron usage of the 5’ exon (exon 11), the retained intron containing predicted splice-acceptor disrupting editing site, or the 3’ exon (exon 12). The p-values displayed were computed via an ANOVA-like test for relative usage changes correlated with any sample group using DEXSeq.

**S16 Fig. mRNA abundance of ADAR family members across hibernation stages.** FPKM values for *ADAR*, *ADARB1*, and *ADARB2*. FDR values derived from ANOVA-like test for differential expression across sampled hibernation states.

**S17 Fig. Normalized counts for reads containing G increase during late torpor and arousing from torpor.** Heatmap of normalized read counts (CPM) for reads containing A (reference) or G (edited) nucleotides. Columns for G containing reads are ordered by hierarchical clustering. Columns for A containing reads are ordered based on the column orders for samples in the G containing read heatmap for ease of visualization.

**S1 Table. Editing sites conserved across mammals, mice, or humans.**

**S2 Table. Summaries for editing sites with decreased editing in cold stages.**

**S3 Table. Summaries for constitutive and cold-enriched editing sites.**

**S4 Table. RNA-seq library sequencing metrics.**

**S5 Table. Primer sequences for editing site validation by cDNA and gDNA Dideoxy sequencing.**
