# Supplementary material
Source: HighWire-hosted journal article supplement (doi:10.1101/rna.066522.118)
Supplement: Supplemental_Table_S2.xlsx [file Supplemental_Table_S2.xlsx]

## Sheet: Description
Columns

## Sheet: GATK Sites Decreased Editing
region

## Sheet: Hyperedited Sites Decreased Edi
region
