# Supplementary material
Source: HighWire-hosted journal article supplement (doi:10.1101/rna.066522.118)
Supplement: Supplemental_Table_S4.xlsx [file Supplemental_Table_S4.xlsx]

## Sheet: Sheet 1
fastq_id	sample_title	sample_id	region	State	sacTb	Number of reads after quality and adapter trimming	Uniquely mapped reads %	% of reads mapped to multiple loci	sequencing_read_length
B153_3_CTTGTA_L001	Forebrain_IBA_rep4	B153	cerebrum	IBA	35.6	28082705	87.41%	1.35%	126
B163_9_ATGTCA_L001	Forebrain_IBA_rep5	B163	cerebrum	IBA	35.4	17872439	89.03%	1.34%	126
B30_2_GCCAAT_L001	Forebrain_SA_rep1	B30	cerebrum	SA	37	16056360	87.69%	1.37%	126
B31_8_AGTTCC_L001	Forebrain_SA_rep2	B31	cerebrum	SA	37	26589559	88.20%	1.37%	126
B32_14_CCGTCC_L002	Forebrain_SA_rep3	B32	cerebrum	SA	37	24520439	84.34%	1.42%	126
B33_20_ATTCCT_L002	Forebrain_SA_rep4	B33	cerebrum	SA	37	23926519	84.74%	1.40%	126
B34_26_GCCAAT_L003	Forebrain_SA_rep5	B34	cerebrum	SA	37	28636496	87.71%	1.38%	126
B53_6_GATCAG_L001	Forebrain_Ar_rep1	B53	cerebrum	Ar	12.8	19181654	86.67%	1.44%	126
B54_12_TGACCA_L002	Forebrain_Ar_rep2	B54	cerebrum	Ar	7.9	24264249	85.61%	1.40%	126
B55_4_GTGAAA_L001	Forebrain_Ent_rep1	B55	cerebrum	Ent	27	30575018	84.56%	1.40%	126
B57_18_GAGTGG_L002	Forebrain_Ar_rep3	B57	cerebrum	Ar	7.9	25564266	87.92%	1.48%	126
B58_24_GGCTAC_L003	Forebrain_Ar_rep4	B58	cerebrum	Ar	8.3	24003162	86.44%	1.41%	126
B59_10_GTCCGC_L001	Forebrain_Ent_rep2	B59	cerebrum	Ent	26.6	31138935	87.22%	1.40%	126
B61_30_GATCAG_L003	Forebrain_Ar_rep5	B61	cerebrum	Ar	8.2	37940323	87.99%	1.49%	126
B62_16_GTTTCG_L002	Forebrain_Ent_rep3	B62	cerebrum	Ent	23.3	24624109	86.33%	1.43%	126
B64_22_ACTTGA_L003	Forebrain_Ent_rep4	B64	cerebrum	Ent	23	25797864	86.65%	1.40%	126
B65_5_TTAGGC_L001	Forebrain_LT_rep1	B65	cerebrum	LT	5.5	20103363	87.65%	1.41%	126
B66_28_GTGAAA_L003	Forebrain_Ent_rep5	B66	cerebrum	Ent	27	25191614	77.18%	1.27%	126
B67_11_CGATGT_L002	Forebrain_LT_rep2	B67	cerebrum	LT	6.6	23226252	88.00%	1.39%	126
B68_17_CGTACG_L002	Forebrain_LT_rep3	B68	cerebrum	LT	6.2	24538039	86.73%	1.40%	126
B69_15_GTGGCC_L002	Forebrain_IBA_rep1	B69	cerebrum	IBA	30.6	24240755	87.39%	1.40%	126
B70_21_ATCACG_L003	Forebrain_IBA_rep2	B70	cerebrum	IBA	31.5	26849801	86.08%	1.36%	126
B72_23_TAGCTT_L003	Forebrain_LT_rep4	B72	cerebrum	LT	5.6	23728240	86.69%	1.35%	126
B74_29_TTAGGC_L003	Forebrain_LT_rep5	B74	cerebrum	LT	5.7	41922888	88.97%	1.46%	126
B77_13_CAGATC_L002	Forebrain_SpD_rep1	B77	cerebrum	SpD	37	25877192	83.72%	1.33%	126
B78_27_CTTGTA_L003	Forebrain_IBA_rep3	B78	cerebrum	IBA	37.4	28146986	87.51%	1.39%	126
B79_19_ACTGAT_L002	Forebrain_SpD_rep2	B79	cerebrum	SpD	37	26263319	86.45%	1.40%	126
B80_25_ACAGTG_L003	Forebrain_SpD_rep3	B80	cerebrum	SpD	37	26800499	86.76%	1.40%	126
B83_1_ACAGTG_L001	Forebrain_SpD_rep4	B83	cerebrum	SpD	37	16632203	86.68%	1.31%	126
B84_7_AGTCAA_L001	Forebrain_SpD_rep5	B84	cerebrum	SpD	37	25284581	86.58%	1.35%	126
31-H53_S35_L005	Hypothalamus_Ar_rep1	H53	hypothalamus	Ar	12.8	20149510	86.75%	1.47%	151
32-H59_S36_L005	Hypothalamus_Ent_rep1	H59	hypothalamus	Ent	26.6	27799326	87.84%	1.48%	151
33-H69_S37_L005	Hypothalamus_IBA_rep1	H69	hypothalamus	IBA	30.6	20307765	88.46%	1.47%	151
34-H65_S38_L005	Hypothalamus_LT_rep1	H65	hypothalamus	LT	5.5	21522645	87.86%	1.47%	151
35-H29_S39_L005	Hypothalamus_SA_rep1	H29	hypothalamus	SA	37	21405184	87.19%	1.43%	151
36-H83_S40_L005	Hypothalamus_SpD_rep4	H83	hypothalamus	SpD	37	25318853	87.18%	1.45%	151
37-H54_S41_L005	Hypothalamus_Ar_rep2	H54	hypothalamus	Ar	7.9	19419562	88.24%	1.45%	151
38-H62_S42_L005	Hypothalamus_Ent_rep2	H62	hypothalamus	Ent	23.3	29722914	88.29%	1.50%	151
39-H70_S43_L005	Hypothalamus_IBA_rep2	H70	hypothalamus	IBA	31.5	21534370	87.95%	1.47%	151
40-H67_S44_L005	Hypothalamus_LT_rep2	H67	hypothalamus	LT	6.6	28431927	89.91%	1.48%	151
41-H30_S45_L005	Hypothalamus_SA_rep2	H30	hypothalamus	SA	37	25190981	87.62%	1.46%	151
42-H84_S46_L005	Hypothalamus_SpD_rep5	H84	hypothalamus	SpD	37	23200820	87.76%	1.49%	151
43-H57_S47_L005	Hypothalamus_Ar_rep3	H57	hypothalamus	Ar	7.9	23220841	89.67%	1.50%	151
44-H64_S48_L005	Hypothalamus_Ent_rep3	H64	hypothalamus	Ent	23	26706899	88.51%	1.51%	151
45-H78_S49_L005	Hypothalamus_IBA_rep3	H78	hypothalamus	IBA	37.4	23755554	88.57%	1.47%	151
46-H68_S59_L008	Hypothalamus_LT_rep3	H68	hypothalamus	LT	6.2	22992019	89.15%	1.49%	151
47-H31_S60_L008	Hypothalamus_SA_rep3	H31	hypothalamus	SA	37	24835691	87.09%	1.48%	151
48-H77_S61_L008	Hypothalamus_SpD_rep1	H77	hypothalamus	SpD	37	21471339	86.82%	1.46%	151
49-H60_S62_L008	Hypothalamus_Ar_rep4	H60	hypothalamus	Ar	7	32899483	86.13%	1.45%	151
50-H66_S63_L008	Hypothalamus_Ent_rep4	H66	hypothalamus	Ent	27	22041191	88.19%	1.46%	151
51-H153_S64_L008	Hypothalamus_IBA_rep4	H153	hypothalamus	IBA	35.6	20824188	86.34%	1.42%	151
52-H72_S65_L008	Hypothalamus_LT_rep4	H72	hypothalamus	LT	5.6	27267169	87.58%	1.47%	151
53-H33_S66_L008	Hypothalamus_SA_rep4	H33	hypothalamus	SA	37	29393427	87.86%	1.48%	151
54-H79_S67_L008	Hypothalamus_SpD_rep2	H79	hypothalamus	SpD	37	27836663	87.74%	1.46%	151
55-H61_S68_L008	Hypothalamus_Ar_rep5	H61	hypothalamus	Ar	8.2	21191646	89.93%	1.48%	151
56-H164_S69_L008	Hypothalamus_Ent_rep5	H164	hypothalamus	Ent	25.4	27260155	88.54%	1.50%	151
57-H163_S70_L008	Hypothalamus_IBA_rep5	H163	hypothalamus	IBA	35.4	20964295	80.19%	1.34%	151
58-H74_S71_L008	Hypothalamus_LT_rep5	H74	hypothalamus	LT	5.7	23798059	88.05%	1.46%	151
59-H34_S72_L008	Hypothalamus_SA_rep5	H34	hypothalamus	SA	37	23823007	87.76%	1.48%	151
60-H80_S73_L008	Hypothalamus_SpD_rep3	H80	hypothalamus	SpD	37	26498334	85.39%	1.43%	151
1-M53_S1_L001	Medulla_Ar_rep1	M53	medulla	Ar	12.8	23602832	86.90%	1.49%	151
10-M67_S10_L001	Medulla_LT_rep2	M67	medulla	LT	6.6	29203803	83.89%	1.45%	151
11-M31_S11_L001	Medulla_SA_rep2	M31	medulla	SA	37	25920827	79.14%	1.46%	151
12-M84_S12_L001	Medulla_SpD_rep5	M84	medulla	SpD	37	26395836	79.56%	1.41%	151
13-M57_S13_L001	Medulla_Ar_rep3	M57	medulla	Ar	7.9	21895366	87.93%	1.52%	151
14-M62_S14_L001	Medulla_Ent_rep3	M62	medulla	Ent	23.3	26049766	84.41%	1.47%	151
15-M78_S15_L001	Medulla_IBA_rep3	M78	medulla	IBA	37.4	22817872	84.78%	1.47%	151
16-M68_S20_L003	Medulla_LT_rep3	M68	medulla	LT	6.2	24233953	87.84%	1.54%	151
17-M32_S21_L003	Medulla_SA_rep3	M32	medulla	SA	37	25683172	80.02%	1.49%	151
18-M77_S22_L003	Medulla_SpD_rep1	M77	medulla	SpD	37	22674263	79.57%	1.44%	151
19-M58_S23_L003	Medulla_Ar_rep4	M58	medulla	Ar	8.3	27291310	81.26%	1.43%	151
2-M55_S2_L001	Medulla_Ent_rep1	M55	medulla	Ent	27	25637696	86.16%	1.49%	151
20-M66_S24_L003	Medulla_Ent_rep4	M66	medulla	Ent	27	23546628	81.83%	1.46%	151
21-M153_S25_L003	Medulla_IBA_rep4	M153	medulla	IBA	35.6	22499730	82.81%	1.47%	151
22-M72_S26_L003	Medulla_LT_rep4	M72	medulla	LT	5.6	29504470	84.05%	1.54%	151
23-M33_S27_L003	Medulla_SA_rep4	M33	medulla	SA	37	30118967	82.04%	1.52%	151
24-M79_S28_L003	Medulla_SpD_rep2	M79	medulla	SpD	37	30418760	83.32%	1.51%	151
25-M61_S29_L003	Medulla_Ar_rep5	M61	medulla	Ar	8.2	21700879	85.82%	1.79%	151
26-M164_S30_L003	Medulla_Ent_rep5	M164	medulla	Ent	25.4	25489165	87.36%	1.48%	151
27-M163_S31_L003	Medulla_IBA_rep5	M163	medulla	IBA	35.4	21054002	88.11%	1.46%	151
28-M74_S32_L003	Medulla_LT_rep5	M74	medulla	LT	5.7	22974483	84.71%	1.51%	151
29-M34_S33_L003	Medulla_SA_rep5	M34	medulla	SA	37	24631729	83.62%	1.48%	151
3-M69_S3_L001	Medulla_IBA_rep1	M69	medulla	IBA	30.6	22689143	85.93%	1.49%	151
30-M80_S34_L003	Medulla_SpD_rep3	M80	medulla	SpD	37	24572665	82.77%	1.51%	151
4-M65_S4_L001	Medulla_LT_rep1	M65	medulla	LT	5.5	24660035	86.93%	1.52%	151
5-M30_S5_L001	Medulla_SA_rep1	M30	medulla	SA	37	23465799	84.30%	1.49%	151
6-M83_S6_L001	Medulla_SpD_rep4	M83	medulla	SpD	37	26467280	80.58%	1.46%	151
7-M54_S7_L001	Medulla_Ar_rep2	M54	medulla	Ar	7.9	22859822	85.94%	1.49%	151
8-M59_S8_L001	Medulla_Ent_rep2	M59	medulla	Ent	26.6	24875022	85.21%	1.50%	151
9-M70_S9_L001	Medulla_IBA_rep2	M70	medulla	IBA	31.5	22832865	86.08%	1.48%	151
